# Supplementary material
Source: PubMed Central journal article supplement (PMC2464678)
Supplement: rsbl20060610s11.pdf [file rsbl20060610s11.pdf]

# 1 Electronic appendix

2 Appendix Table 1. A detailed description of the study areas in Chizé and Trois Fontaines,  
3 France.

| Parameter                           | Chizé                                                                                                                                                                                                                                                      | <i>Trois Fontaines</i>                                                                                                                     |
|-------------------------------------|------------------------------------------------------------------------------------------------------------------------------------------------------------------------------------------------------------------------------------------------------------|--------------------------------------------------------------------------------------------------------------------------------------------|
| Size                                | 2614 ha                                                                                                                                                                                                                                                    | 1360 ha                                                                                                                                    |
| Climate in general                  | Temperate oceanic with mediterranean influence                                                                                                                                                                                                             | Continental                                                                                                                                |
| Winter climate                      | Mild winters (mean daily temperature of 5°C in January and only 44 days per year below 0°C)                                                                                                                                                                | Moderately severe winters (mean daily temperature of 2°C in January)                                                                       |
| Summer climate                      | Hot and dry (mean daily temperature in July is 20.4°C, total rainfall in May–June is 88 mm and total rainfall in July–August is 98 mm)                                                                                                                     | Hot but not dry (mean daily temperature in July is 19°C, total rainfall in May-June is 150 mm and total rainfall in July-August is 130 mm) |
| Soils                               | Shallow, calcareous, and not very fertile                                                                                                                                                                                                                  | Fertile                                                                                                                                    |
| Habitat structure                   | 1/3 of the area of poor quality. The remaining 2/3 is of intermediate habitat quality                                                                                                                                                                      | Homogeneous at the large scale. High quality                                                                                               |
| Forest productivity (wood produced) | 3.77 m <sup>3</sup> /ha/year                                                                                                                                                                                                                               | 5.92 m <sup>3</sup> /ha/year                                                                                                               |
| Dominating tree species             | Beech ( <i>Fagus sylvatica</i> ) and oak ( <i>Quercus</i> sp.)                                                                                                                                                                                             | Beech and oak                                                                                                                              |
| Dominating coppice species          | Poor area: often no coppice. Intermediate area: Montpellier maple ( <i>Acer monspessulanum</i> )                                                                                                                                                           | Hornbeam ( <i>Carpinus betulus</i> )                                                                                                       |
| Dominating understory species       | Poor area: Wood false brome ( <i>Brachypodium</i> sp.), butcher's broom ( <i>Ruscus aculeatus</i> ), ivy ( <i>Hedera helix</i> ), wild madder ( <i>Rubia peregrina</i> ) and wood melick ( <i>Melica uniflora</i> )<br>Intermediate area: Ivy and brambles | Ivy and brambles ( <i>Rubus</i> sp.)                                                                                                       |

4 Appendix Table 2. The sample size for roe deer (n=93) data separated by age and sex for  
 5 each of the two populations.

| Age   | Chizé |         | Trois Fontaines |         |
|-------|-------|---------|-----------------|---------|
|       | Males | Females | Males           | Females |
| 1     | 6     | 3       | 4               | 4       |
| 2     | 4     | 2       | 4               | 4       |
| 3     | 3     | -       | 4               | 2       |
| 4     | 2     | -       | -               | 3       |
| 5     | 1     | 1       | 1               | 4       |
| 6     | 1     | -       | 2               | 2       |
| 7     | 1     | 1       | 1               | 1       |
| 8     | -     | 1       | 4               | 3       |
| 9     | 1     | -       | 1               | 3       |
| 10    | 2     | 1       | 1               | 3       |
| 11    | -     | 1       | -               | 2       |
| 12    | -     | 2       | -               | 1       |
| 13    | 2     | -       | 1               | -       |
| 14    | -     | -       | -               | -       |
| 15    | -     | 1       | -               | -       |
| 16    | -     | 1       | -               | -       |
| 17    | -     | 1       | -               | -       |
| Total | 23    | 15      | 23              | 32      |

6

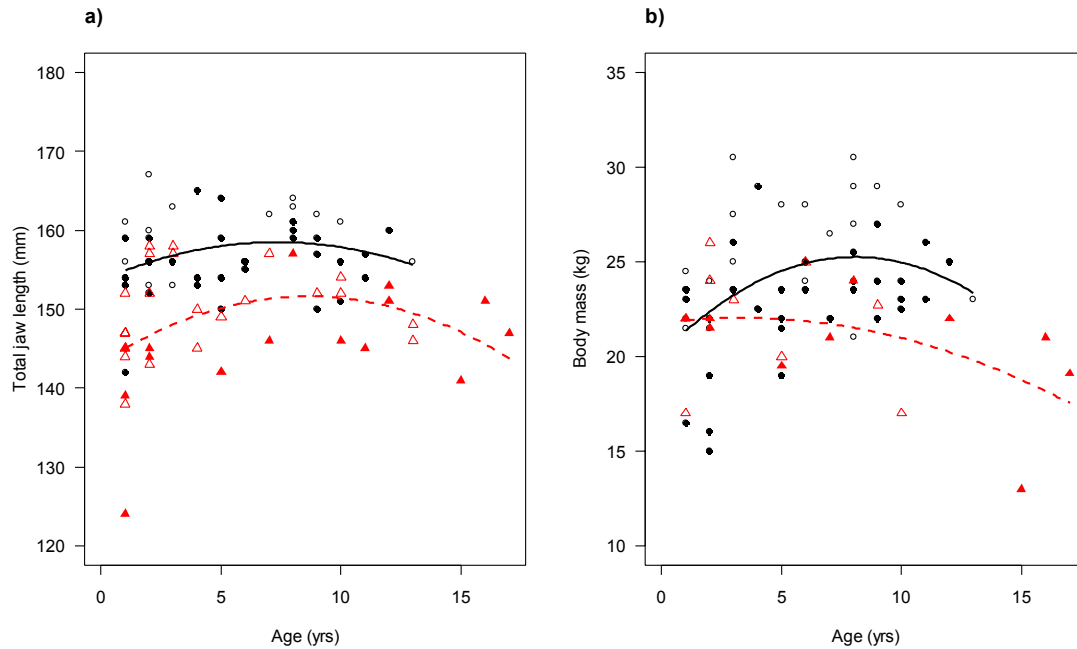

8

9

10 Appendix Figure 1. Total jaw length, a), and body mass, b), for animals of varying age  
 11 from Chizé (females: filled red triangles; males: open red triangles) and Trois Fontaines  
 12 (females: black dots; males: open black circles). Predicted values for each population,  
 13 males and females being merged, are indicated by lines (Chizé: dashed; Trois Fontaines:  
 14 solid).

15

16

17
